# Supplementary material for: Correlation of genomic alterations assessed by next-generation sequencing (NGS) of tumor tissue DNA and circulating tumor DNA (ctDNA) in metastatic renal cell carcinoma (mRCC): potential clinical implications
Source: PubMed Central journal article supplement (PMC5464894; doi:10.18632/oncotarget.16833), 2017-04-04
Supplement: oncotarget-08-33614-s001.pdf [file oncotarget-08-33614-s001.pdf]

## Correlation of genomic alterations assessed by next-generation sequencing (NGS) of tumor tissue DNA and circulating tumor DNA (ctDNA) in metastatic renal cell carcinoma (mRCC): potential clinical implications

### Supplementary Materials

**Supplementary Table 1: Mutations identified by tissue compared to ctDNA NGS**

| Pt | TISSUE BASED NGS PROFILE                                                                                                                                        | # mutations | ctDNA BASED NGS PROFILE                                                   | # mutations |
|----|-----------------------------------------------------------------------------------------------------------------------------------------------------------------|-------------|---------------------------------------------------------------------------|-------------|
| 1  | PIK3CA, PTEN, BAP1, BRD4, BTG1, CCND3, CHD2, CIC, FAT1, MLL2, NF1, POLE, PREX2, RICTOR, RUNX1T1                                                                 | 15          | CCND1                                                                     | 1           |
| 2  | <u>TP53 G105S</u> , <u>VHL L153P</u> , TP53 L25fs*20, CDKN2A, CDKN2B, SETD2, TERT promoter, BLM, BRCA2, DOT1L, EPHA5, IKBKE, MED12, MLL2, MYCN, PIK3C2b, TGFBR2 | 17          | <u>TP53 G105S</u> , <u>VHL L153P</u> , TP53 R110C, TP53 G245S             | 4           |
| 3  | NF1, BAP1, TP53, ARID1B, ATM, BRCA1/2, GNAS, HNF1A, MAP2K2, MLL2, SDHA                                                                                          | 11          | EGFR                                                                      | 1           |
| 4  | CDKN2C, CD79A, EPHA5, FAT1, HSP90AA1, KDM6A, NTRK1, RUNX1T1, SPEN, ZBTB2                                                                                        | 10          | RHOA, BRAF, PDGFRA, KIT, CDK6, EGFR, CCND2, MET, CDK4, KRAS, CCNE1, CCND1 | 12          |
| 5  | ALK, EP300, FANCD2, FGFR4, IRS2, PRSS8, TOP2A, TP53, WISP3                                                                                                      | 9           | PIK3CA                                                                    | 1           |
| 6  | <u>TP53 T155N</u> , EMSY, HGF, ARID1B, ATM, BARD1, BRIP1, MLL, NTRK3, PBRM1, SDHD                                                                               | 11          | <u>TP53 T155N</u> , RB1, PDGFRA                                           | 3           |
| 7  | ARID1A, PBRM1, SETD2, EPHA5, ERBB4, MAP3K1, RPTOR                                                                                                               | 7           | FGFR2, JAK2, CDH1, TP53                                                   | 4           |
| 8  | VHL, BRCA2, PBRM1, SETD2, TERT, AXL, FANCF, FGFR4, GLI1, POLD1, RANBP2                                                                                          | 11          | None                                                                      | 0           |
| 9  | MDM2, DNMT3A, FRS2, PBRM1, SETD2, TET2, VHL, ARID1A, BARD1, BRCA2, EP300, MLL3, PDGFRB, RET, RICTOR, TSC2                                                       | 16          | None                                                                      | 0           |
| 10 | RB1, TERT, TP53, ARID2, CIC, CREBBP, GATA2, NOTCH2, PALB2, PMS2                                                                                                 | 10          | None                                                                      | 0           |
| 11 | PTEN, RB1, TP53, BRCA1, CRLF2, ERBB3, MEN1, PALB2, SPTA1                                                                                                        | 9           | None                                                                      | 0           |
| 12 | <u>VHL L89P</u> , ASXL1, ARID1B, ATRX, BAP1, FLT4, PREX2, RSC1, SNCAIP                                                                                          | 9           | <u>VHL L89P</u> , TP53, MET, CDH1                                         | 4           |
| 13 | <u>VHL L135</u> , TP53, CDKN2A/B, PTEN, AKT2, AXL, CCNE1                                                                                                        | 7           | <u>VHL L135</u> , NRAS                                                    | 2           |
| 14 | TSC1, GATA2, PARK2, TP53, BARD1, CHD2, HSD3B1, MAP3K1, MTOR, PALB2                                                                                              | 10          | AR, PIK3CA, STK11, ERBB2, NOTCH1, ARID1A                                  | 6           |
| 15 | PBRM1, VHL, MTOR, BCORL1, EPHA5, ERBB3, MAP3K                                                                                                                   | 7           | None                                                                      | 0           |
| 16 | KDM5C, CCND3, FANCD2, NF1, POLE, PRSS8, SPEN                                                                                                                    | 7           | None                                                                      | 0           |
| 17 | <u>TP53 H193R</u> , <u>RAF T310S</u> , VHL, BAP1, BRCA2, CD274, MLL2, NOTCH2, NTRK2                                                                             | 9           | <u>TP53 H193R</u> , <u>RAF T310S</u>                                      | 2           |
| 18 | <u>VHL P86T</u> , CDKN2A, PBRM1, CARD11, CBL, NTRK                                                                                                              | 6           | <u>VHL P86T</u>                                                           | 1           |
| 19 | PBRM1, SETD2, VHL, ALK, ARID1A, ATRX, BLM, HSP90AA1, PRKDC, RICTOR, PTPN11                                                                                      | 11          | GNAS                                                                      | 1           |

**Supplementary Document 1: For FoundationOne, 315 cancer related genes interrogated for mutation. See Supplementary\_Document\_1.**
